# Supplementary material for: Synthesis of mono- and bis-tetrazolato complexes of Ni(II), Pt(II) and Cu(II) via 1,3-dipolar cycloadditions of 2-cyanopyridines with metal ligated azides in N,N,O-aminoiminophenolato complexes
Source: Royal Society of Chemistry journal article supplement (doi:10.1039/b902007a), 2009-01-01
Supplement: b902007a.pdf [file b902007a.pdf]

## Supplementary Information

### **Synthesis of mono- and bis-tetrazolato complexes of Ni(II), Pt(II) and Cu(II) via 1,3-dipolar cycloadditions of 2-cyanopyridines with metal ligated azides in N,N,O-aminoiminophenolato complexes**

**Bhaswati Ghosh Mukhopadhyay,<sup>a</sup> Suman Mukhopadhyay,<sup>a</sup> M. Fátima C. Guedes da Silva,<sup>\*a,b</sup> M. Adília Januário Charmier,<sup>\*a,b</sup> and Armando J. L. Pombeiro<sup>\*a</sup>**

<sup>a</sup>*Centro de Química Estrutural, Complexo I, Instituto Superior Técnico, TU Lisbon, Av. Rovisco Pais, 1049-001, Lisbon, Portugal. E-mail: [pombeiro@ist.utl.pt](mailto:pombeiro@ist.utl.pt)*

<sup>b</sup>*Universidade Lusófona de Humanidades e Tecnologias, ULHT Lisbon, Av. Campo Grande n° 376, 1749-024, Lisbon, Portugal. E-mail: [adilia.charmier@ist.utl.pt](mailto:adilia.charmier@ist.utl.pt), [fatima.guedes@ist.utl.pt](mailto:fatima.guedes@ist.utl.pt).*

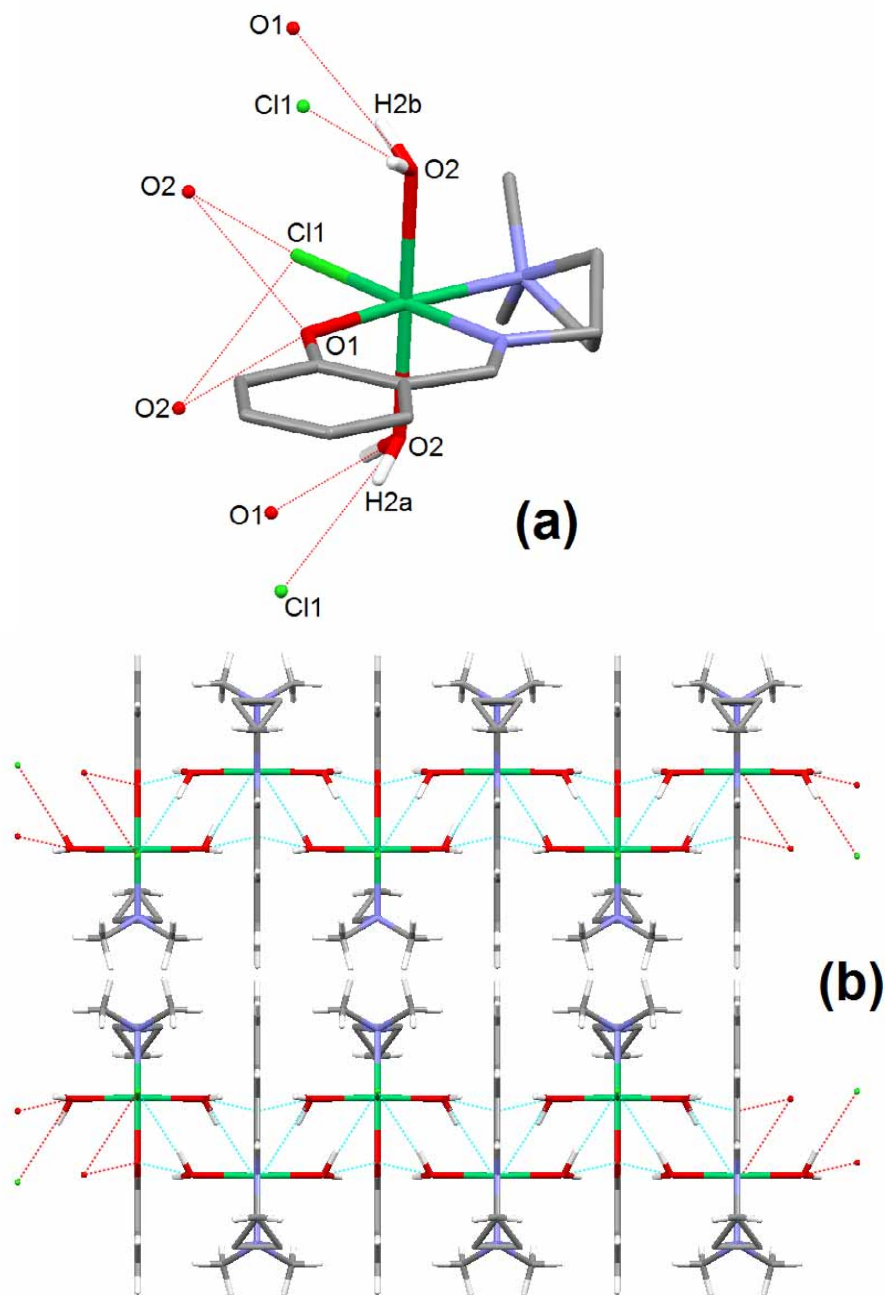

Figure S1 – (a) Hydrogen bond in molecule **1**, D–H...A [ $d(D\cdots A)$  Å;  $\angle(DHA)$  °]: O2–H2a...Cl1<sup>*i*</sup> [2.31 Å, 157.00 °], O2–H2b...O1<sup>*i*</sup> [1.92 Å, 161.00 °] (symmetry code: (i) 1–x, 1/2+y, –z).

(b) Fragment of the crystal packing diagram of **1** along the *a* axis showing the hydrogen bonds (dotted lines) between the chloride ligand and the coordinated water molecules of adjacent molecules resulting in the formation of 1D infinite chains.

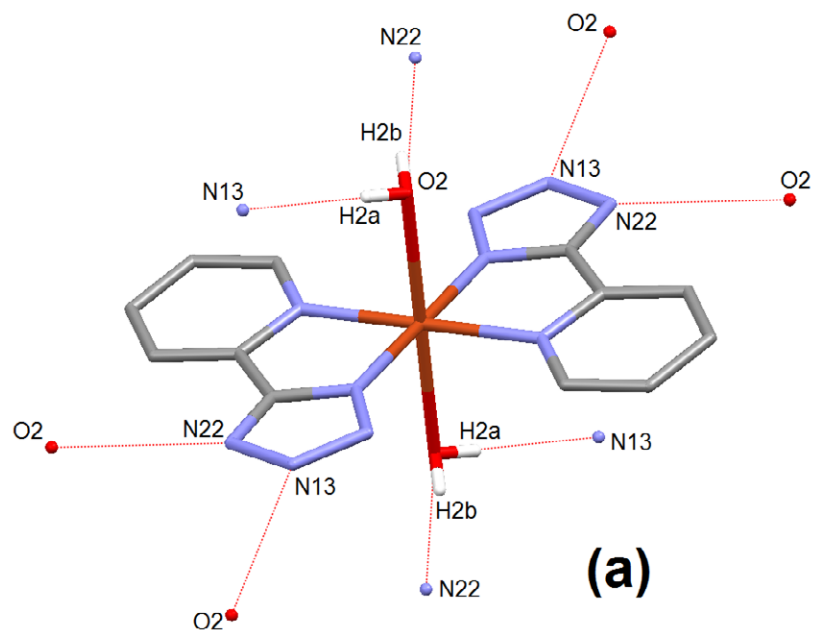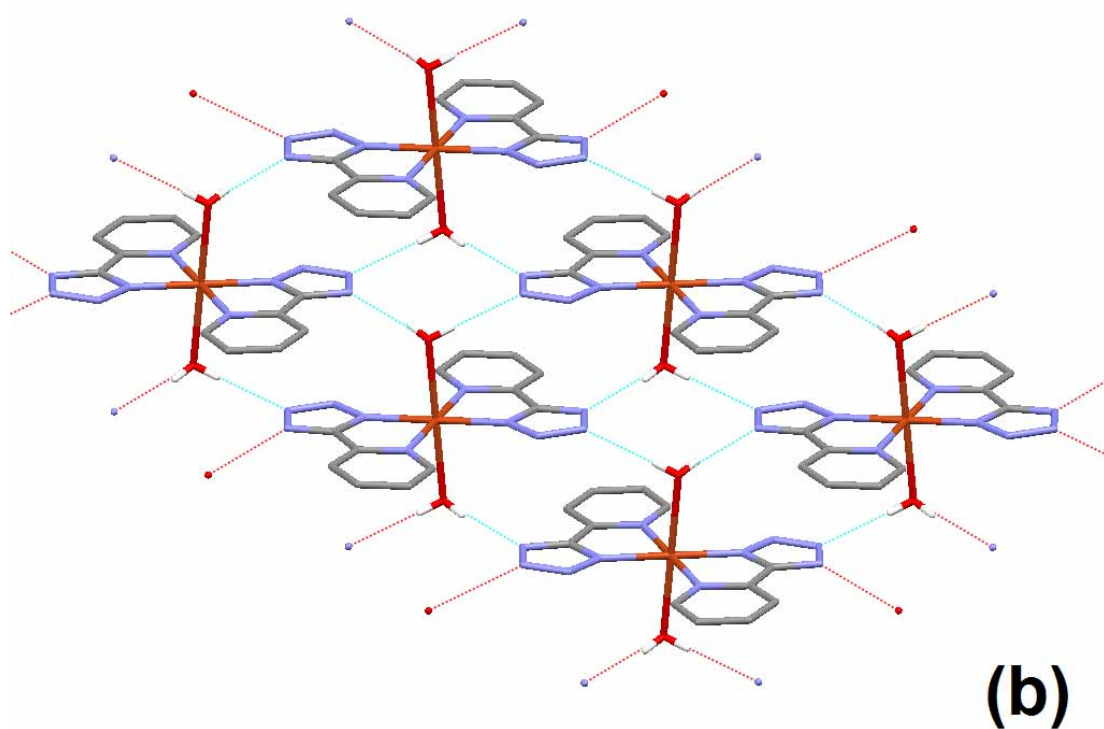

Figure S2 – (a) Hydrogen bond in molecule **8**, D–H...A [ $d(D\cdots A)$  Å;  $\angle(DHA)$  °]: O2–H2a...N13<sup>i</sup> [2.16 Å, 177.4(13) °], O2–H2b...N22<sup>ii</sup> [2.07 Å, 169 °] [symmetry code: (i)  $x, 3/2-y, -1/2+z$ ; (ii)  $-x, 1/2+y, 1/2-z$ ].

(b) Fragment of the crystal packing diagram of **8** along the  $a$  axis showing the hydrogen bonds (dotted lines) between the coordinated water molecules and the tetrazolate nitrogens of adjacent molecules resulting in the formation of 3D framework.
